# Supplementary material for: Design of TiO2-Based Hybrid Systems with Multifunctional Properties
Source: MDPI journal article supplement (doi:10.3390/molecules28041863), 2023-02-16
Supplement: s1 [file s1]

# Design of TiO<sub>2</sub>-Surfactin hybrid systems with multifunctional properties

Simona Ortelli <sup>1\*</sup>, Maurizio Vespignani<sup>1,2</sup>, Ilaria Zanoni<sup>1</sup>, Magda Blosi<sup>1</sup>, Claudia Vineis<sup>3</sup>, Andreana Piancastelli<sup>1</sup>, Stefania Albonetti<sup>1,2</sup>, Anna Luisa Costa<sup>1\*</sup>

<sup>1</sup> CNR-ISSMC, National Research Council of Italy - Institute of Science, Technology and Sustainability for Ceramics, Via Granarolo 64, 48018 Faenza (RA), Italy

<sup>2</sup> Department of Industrial Chemistry "Toso Montanari", Bologna University, Viale Risorgimento 4, 40136 Bologna, Italy

<sup>3</sup> CNR-STIIMA, Institute of Intelligent Industrial Technologies and Systems for Advanced Manufacturing – Italian national Research council, Corso Pella 16, 13900 Biella, Italy

\* Correspondence: simona.ortelli@istec.cnr.it; Tel.: +39 0546 699729; anna.costa@istec.cnr.it Tel.: +39 0546 699718

**Table S1.** Sample codes and TiO<sub>2</sub>:SS weight ratios of nanosols obtained by sol-gel synthesis process and relative powders obtained by SFD process.

| Sample code                  |                                  | TiO <sub>2</sub> :SS weight ratio |
|------------------------------|----------------------------------|-----------------------------------|
| Nanosol                      | Powder                           |                                   |
| TiO <sub>2</sub> @SS_1:0.1_S | TiO <sub>2</sub> @SS_1:0.1_S_SFD | 10.0                              |
| TiO <sub>2</sub> @SS_1:0.5_S | TiO <sub>2</sub> @SS_1:0.5_S_SFD | 2.0                               |
| TiO <sub>2</sub> @SS_1:1_S   | TiO <sub>2</sub> @SS_1:1_S_SFD   | 1.0                               |
| TiO <sub>2</sub> @SS_1:2_S   | TiO <sub>2</sub> @SS_1:2_S_SFD   | 0.5                               |
| TiO <sub>2</sub> @SS_1:6_S   | TiO <sub>2</sub> @SS_1:6_S_SFD   | 0.17                              |
| TiO <sub>2</sub> @SS_1:8_S   | TiO <sub>2</sub> @SS_1:8_S_SFD   | 0.13                              |
| TiO <sub>2</sub> @TX_S       | TiO <sub>2</sub> @TX_S_SFD       | 16.7*                             |

\*TiO<sub>2</sub>:Triton X weight ratio

**Table S2.** Sample codes and TiO<sub>2</sub>:SS weight ratios of nanosols obtained by heterocoagulation process and relative powders obtained by SFD process.

| Sample code                |                                | TiO <sub>2</sub> :SS weight ratio |
|----------------------------|--------------------------------|-----------------------------------|
| Nanosol sample             | Powder sample                  |                                   |
| TiO <sub>2</sub> /SS_1:1_E | TiO <sub>2</sub> /SS_1:1_E_SFD | 1.0                               |
| TiO <sub>2</sub> /SS_1:6_E | TiO <sub>2</sub> /SS_1:6_E_SFD | 0.17                              |
| TiO <sub>2</sub> /SS_1:8_E | TiO <sub>2</sub> /SS_1:8_E_SFD | 0.13                              |

The TiO<sub>2</sub> used to produce the heterocoagulated samples is TiO<sub>2</sub>@TX of Table S1 (containing around 6 wt.% of Triton X)

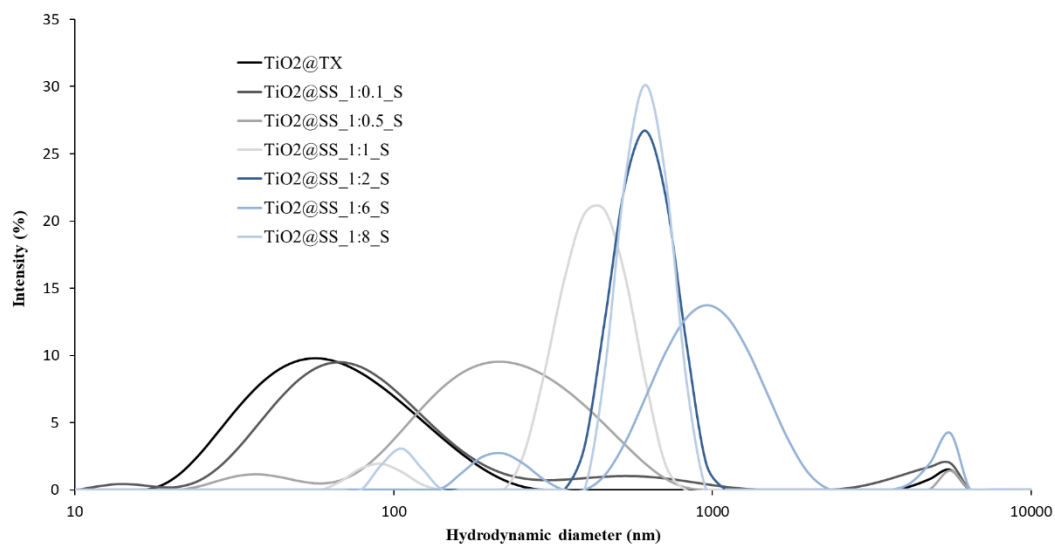

**Figure S1.** Particle size distribution of TiO<sub>2</sub>@SS samples obtained by sol-gel synthesis method.

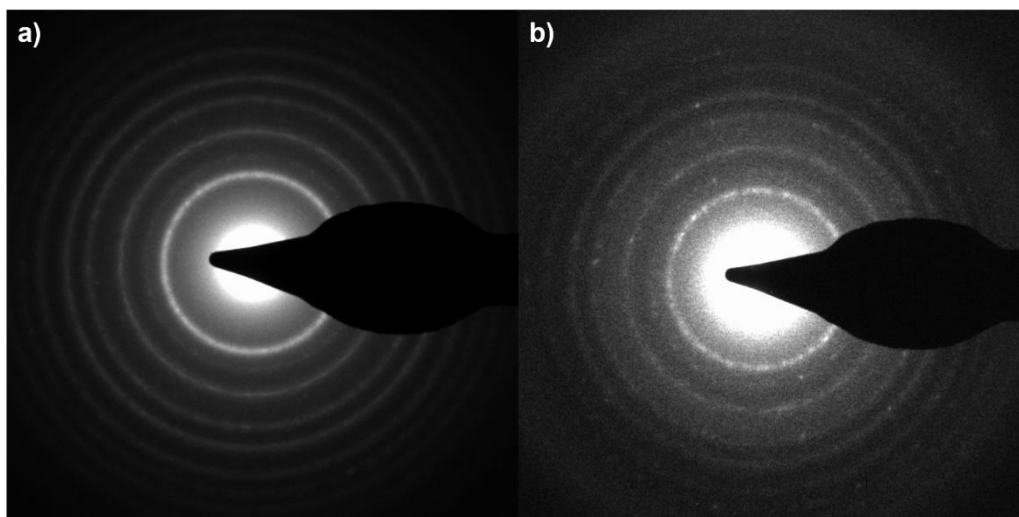

**Figure S2.** SAED patterns of a) TiO<sub>2</sub>@SS\_S\_1:0.1 and b) TiO<sub>2</sub>@SS\_S\_1:1 sample.

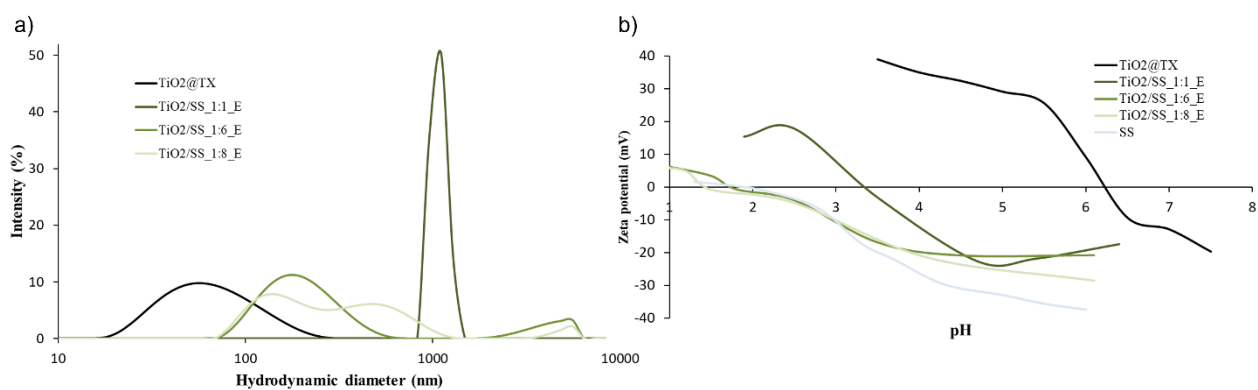

**Figure S3.** a) Particle size distribution and b) Zeta potential as a function of pH curves of TiO<sub>2</sub>/SS\_E samples obtained by heterocoagulation process.

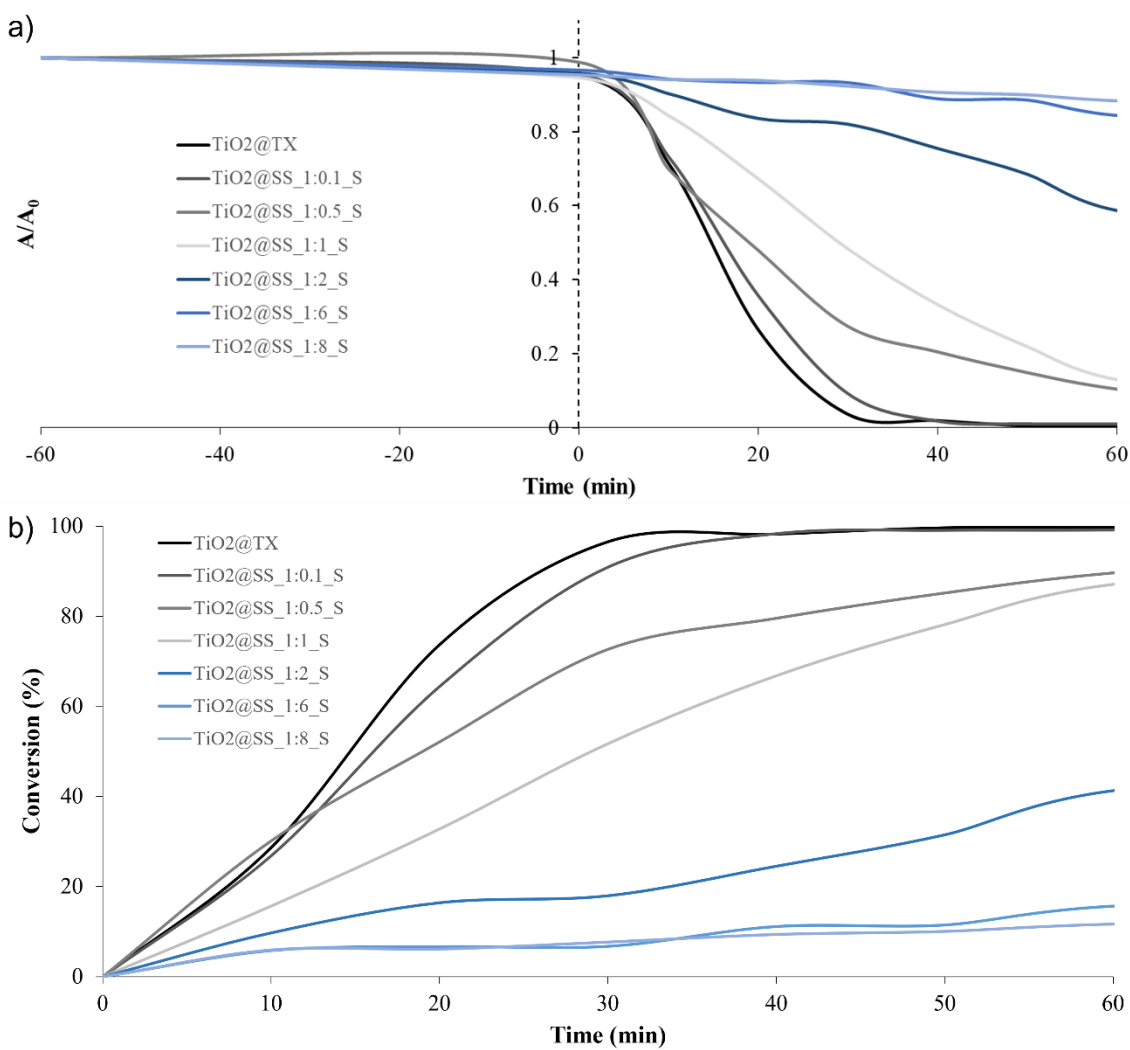

**Figure S4.** a) Trend of A/A<sub>0</sub> and b) Conversion (%) over time of TiO<sub>2</sub>@SS\_S samples obtained by sol-gel synthesis method.

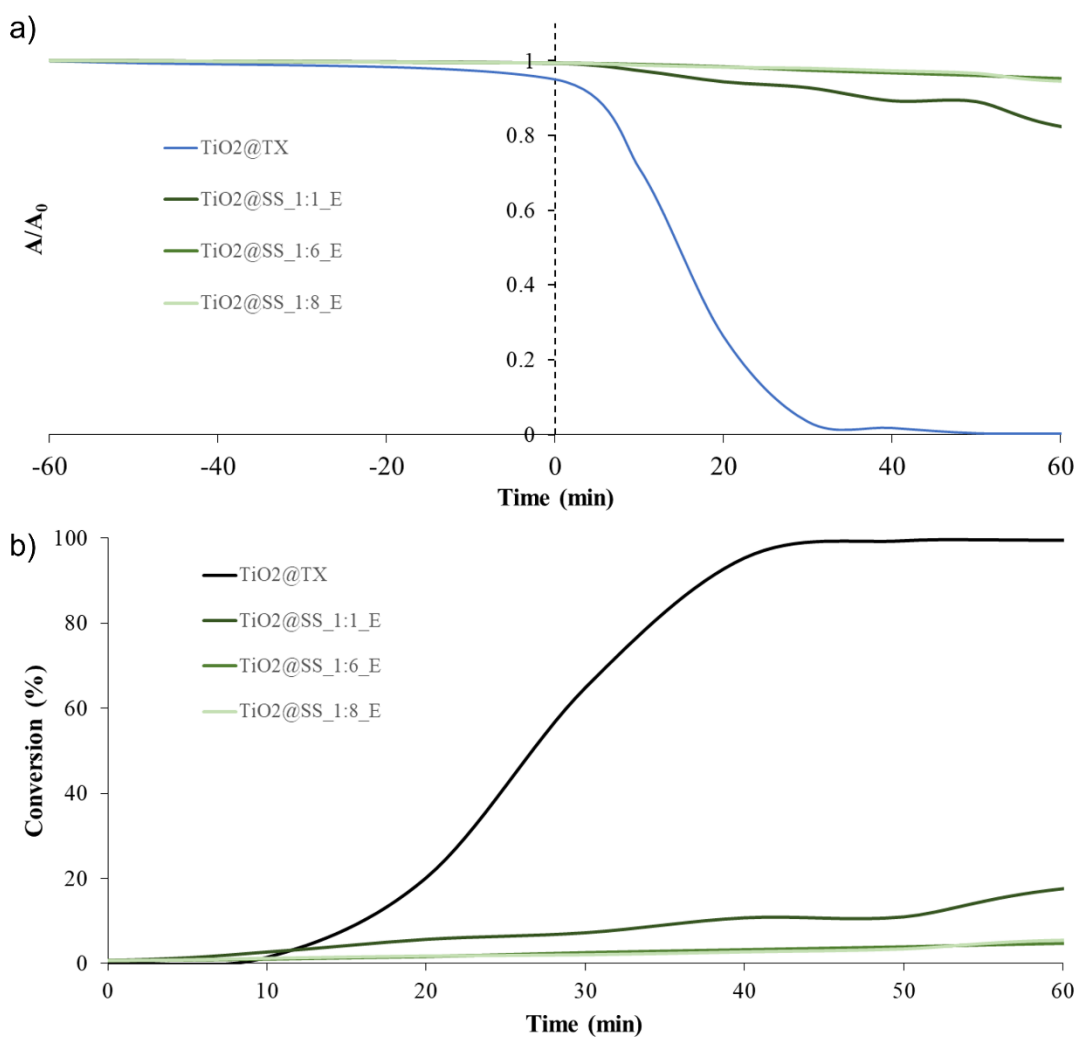

**Figure S5.** a) Trend of  $A/A_0$  and b) Conversion (%) over time of TiO<sub>2</sub>/SS\_E samples obtained by heterocoagulation process.

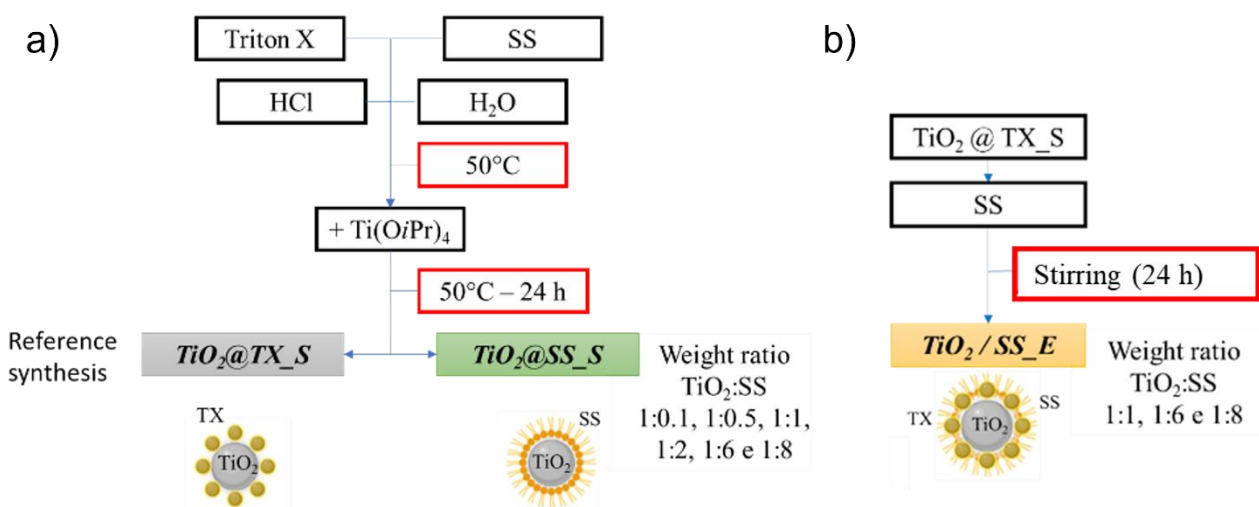

**Figure S6.** Scheme of a) sol-gel processes using Triton X (TX) and Sodium Surfactin (SS) as surfactant and b) heterocoagulation process.

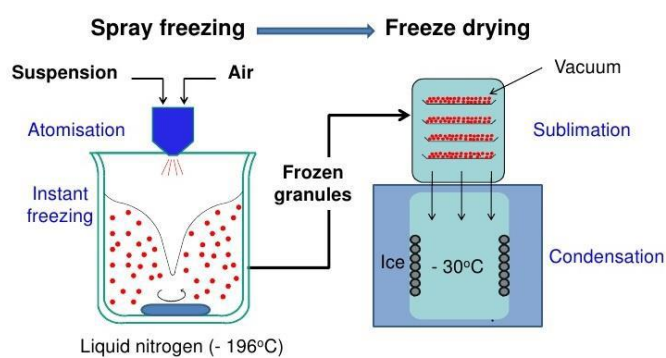

**Figure S7.** Schematisation of the spray-freeze-drying process.

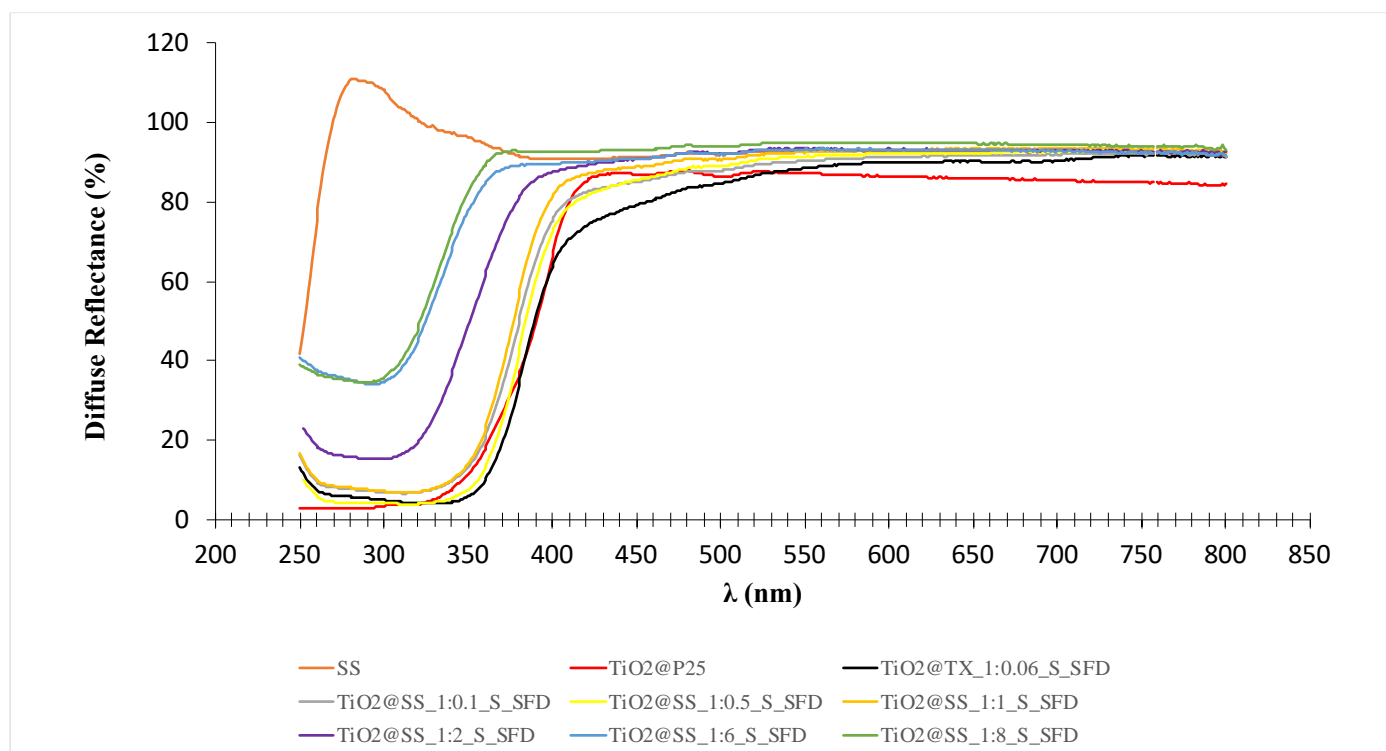

**Figure S8.** Diffuse reflectance over different wavelengths of  $\text{TiO}_2@SS_S$  samples.

**Table S3.** Adsorption properties derived by UV-Vis. analysis.

| <b>Powder sample code</b>             | <b>Absorption range (nm)</b> | <b>Band gap energy (eV)</b> |
|---------------------------------------|------------------------------|-----------------------------|
| <b>TiO<sub>2</sub>@TX_SFD</b>         | 350-450                      | 3.14                        |
| <b>TiO<sub>2</sub> P25*</b>           | 350-420                      | 3.19                        |
| <b>TiO<sub>2</sub>@SS_1:0.1_S_SFD</b> | 350-420                      | 3.17                        |
| <b>TiO<sub>2</sub>@SS_1:0.5_S_SFD</b> | 350-420                      | 3.18                        |
| <b>TiO<sub>2</sub>@SS_1:1_S_SFD</b>   | 350-420                      | 3.18                        |
| <b>TiO<sub>2</sub>@SS_1:2_S_SFD</b>   | 300-380                      | 3.33                        |
| <b>TiO<sub>2</sub>@SS_1:6_S_SFD</b>   | 300-360                      | 3.41                        |
| <b>TiO<sub>2</sub>@SS_1:8_S_SFD</b>   | 300-360                      | 3.41                        |

\*TiO<sub>2</sub> P25 (commercial powder sample from Degussa-Evonik)
